# Supplementary material for: Correlation between Hypoperfusion Intensity Ratio and Functional Outcome in Large-Vessel Occlusion Acute Ischemic Stroke: Comparison with Multi-Phase CT Angiography
Source: MDPI journal article supplement (doi:10.3390/jcm11185274), 2022-09-07
Supplement: s1 [file s1]

## Supplementary Material

### 1 Supplementary Tables

**Supplementary Table S1. Baseline Patient Characteristics in reperfusion therapy group and Comparison of Clinical Variables Stratified by Functional Outcome**

| No. of patients and characteristics               | ALL<br>n= 118(100%) | Favorable outcome<br>n = 70(59%) | Unfavorable outcome<br>n =48(41%) | P-value        |
|---------------------------------------------------|---------------------|----------------------------------|-----------------------------------|----------------|
| Age, Median (IQR)                                 | 66 [55.2, 73]       | 64.5 [55, 72]                    | 68.5 [56, 74.2]                   | 0.275          |
| Male, n (%)                                       | 94 (79.7)           | 58 (82.9)                        | 36 (75)                           | 0.419          |
| Risk factors n (%)                                |                     |                                  |                                   |                |
| Hypertension, n (%)                               | 76 (64.4)           | 44 (62.9)                        | 32 (66.7)                         | 0.819          |
| Diabetes, n (%)                                   | 27 (22.9)           | 10 (14.3)                        | 17 (35.4)                         | 0.014          |
| Hyperlipidemia, n (%)                             | 38 (32.2)           | 25 (35.7)                        | 13 (27.1)                         | 0.432          |
| Prior stroke, n (%)                               | 23 (19.5)           | 13 (18.6)                        | 10 (20.8)                         | 0.946          |
| Coronary artery disease, n (%)                    | 21 (17.8)           | 13 (18.6)                        | 8 (16.7)                          | 0.983          |
| Valvular disease, n (%)                           | 23 (19.5)           | 10 (14.3)                        | 13 (27.1)                         | 0.137          |
| Chronic heart failure, n (%)                      | 7 (5.9)             | 3 (4.3)                          | 4 (8.3)                           | 0.44           |
| Atrial fibrillation, n (%)                        | 26 (22)             | 10 (14.3)                        | 16 (33.3)                         | <b>0.026</b>   |
| Smoke, n (%)                                      | 42 (35.6)           | 27 (38.6)                        | 15 (31.2)                         | 0.535          |
| Drink, n (%)                                      | 22 (18.6)           | 16 (22.9)                        | 6 (12.5)                          | 0.239          |
| Homocysteine, Median [IQR]                        | 12.8 [10, 16.5]     | 12.2 [10, 16.2]                  | 13.1 [10.1, 17]                   | 0.35           |
| SBP, Median [IQR]                                 | 143.5 [129, 162]    | 145.5[128, 162]                  | 140[130, 160]                     | 0.724          |
| DBP, Median [IQR]                                 | 85 [76, 96]         | 86 [76, 98]                      | 82.5 [74, 90]                     | 0.348          |
| HR, Median [IQR]                                  | 80 [71, 88]         | 79 [70, 86]                      | 81 [75, 96]                       | <b>0.16</b>    |
| Blood Glucose, Median [IQR]                       | 5.8 [5.2, 7.2]      | 5.6 [4.8, 6.7]                   | 6.4 [5.7, 8.5]                    | < <b>0.001</b> |
| Glycosylated hemoglobin, Median[IQR]              | 5.8 [5.5, 6]        | 5.7 [5.4, 5.9]                   | 5.9 [5.6, 6.5]                    | 0.007          |
| Time to CT(min) ,Median[IQR]                      | 480[276, 744]       | 480[270, 744]                    | 480[300, 732]                     | 0.943          |
| Baseline NIHSS, Median[IQR]                       | 11[7, 17]           | 8[6, 14]                         | 15 [10, 19]                       | < <b>0.001</b> |
| Imaging items                                     |                     |                                  |                                   |                |
| ASPECTS on NCCT, Median[IQR]                      | 7[6, 8]             | 8[7, 8]                          | 6[5, 7]                           | < <b>0.001</b> |
| Location of occlusion on mCTA, n (%)              |                     |                                  |                                   | 0.899          |
| ICA or Tandem                                     | 39 (33.1)           | 24 (34.3)                        | 15 (31.2)                         |                |
| M1                                                | 56 (47.5)           | 32 (45.7)                        | 24 (50)                           |                |
| M2 or further distal                              | 23 (19.5)           | 14 (20)                          | 9 (18.8)                          |                |
| mCTA score, n (%)                                 |                     |                                  |                                   | <b>0.003</b>   |
| 1                                                 | 4 (3.4)             | 0 (0)                            | 4 (8.3)                           |                |
| 2                                                 | 8 (6.8)             | 2 (2.9)                          | 6 (12.5)                          |                |
| 3                                                 | 64 (54.2)           | 36 (51.4)                        | 28 (58.3)                         |                |
| 4                                                 | 35 (29.7)           | 27 (38.6)                        | 8 (16.7)                          |                |
| 5                                                 | 7 (5.9)             | 5 (7.1)                          | 2 (4.2)                           |                |
| Good collaterals (4-5)                            | 42( 35.6)           | 32(45.7)                         | 10(20. 8)                         |                |
| Poor collaterals (1-3)                            | 76( 64.4)           | 38(54.3)                         | 38(79.2)                          |                |
| mCTA score , Median [IQR]                         | 3[3, 4]             | 3[3, 4]                          | 3[2, 3]                           | < <b>0.001</b> |
| ischemic core volume(rCBF<30%) (mL), Median [IQR] | 4.5[1.8, 15.4]      | 2.2[1.1, 5.5]                    | 12.6[5.2, 30.4]                   | < <b>0.001</b> |
| Mismatch ratio, Median [IQR]                      | 15.8[6, 40.4]       | 23.1[11.7, 55.8]                 | 7[4.3, 19.1]                      | < <b>0.001</b> |
| TMax>6s volume(mL), Median [IQR]                  | 82.6[55.4, 126.4]   | 70.2[43.4, 97.8]                 | 99.8[72.4, 167.8]                 | < <b>0.001</b> |
| TMax>10s volume(mL), Median [IQR]                 | 18.2[6.8, 37.6]     | 7.7[4.4, 17.5]                   | 38.8[28.2, 67]                    | < <b>0.001</b> |
| HIR, Median [IQR]                                 | 0.2[0.1, 0.4]       | 0.1[0.1, 0.2]                    | 0.4[0.3, 0.4]                     | < <b>0.001</b> |
| FIV, Median [IQR]                                 | 20.6[8.6, 73.2]     | 12.1[7.4, 17.6]                  | 87[43.4, 166]                     | < <b>0.001</b> |
| Type of treatment, n (%)                          |                     |                                  |                                   | 0.358          |
| Intravenous thrombolysis                          | 31 (26.3)           | 19 (27.1)                        | 12 (25)                           |                |
| Bridging therapy                                  | 14 (11.9)           | 7 (10)                           | 7 (14.6)                          |                |
| EVT                                               | 73 (61.9)           | 44 (62.9)                        | 29 (60.4)                         |                |
| 90d_mRS, Median [IQR]                             | 2[1, 4]             | 1[0, 2]                          | 4[3, 5]                           | < <b>0.001</b> |

**Supplementary Table S2. Baseline Patient Characteristics in IVT and EVT group and Comparison of Clinical Variables Stratified by Functional Outcome**

| No. of patients and characteristics | IVT                                |                                     |                   | EVT                                |                                     |                   |
|-------------------------------------|------------------------------------|-------------------------------------|-------------------|------------------------------------|-------------------------------------|-------------------|
|                                     | Favorable outcome<br>n = 19(61.3%) | Unfavorable outcome<br>n =12(38.7%) | P-value           | Favorable outcome<br>n = 51(58.6%) | Unfavorable outcome<br>n =36(41.4%) | P-value           |
| Age                                 | 62[58.5, 71]                       | 69.5 [54, 75]                       | 0.405             | 66[51.5, 72]                       | 68 [56, 74]                         | 0.41              |
| Male, n (%)                         | 16 (84.2)                          | 7 (58.3)                            | 0.206             | 42 (82.4)                          | 29 (80.6)                           | 1                 |
| Blood Glucose                       | 5.2[4.6, 5.7]                      | 6.1 [5.0, 6.9]                      | <b>0.054</b>      | 5.8[5.1, 7.3]                      | 6.5[5.8, 8.6]                       | <b>0.008</b>      |
| Time to CT(min)                     | 240[180, 372]                      | 288[150, 300]                       | 0.568             | 570[360, 870]                      | 648[414, 780]                       | 0.746             |
| Baseline NIHSS                      | 7[5, 10]                           | 15 [9, 17]                          | <b>0.003</b>      | 10[7, 16]                          | 16 [10, 20]                         | <b>0.003</b>      |
| ASPECTS                             | 8[8, 8]                            | 6[6, 7]                             | <b>&lt; 0.001</b> | 7[7, 8]                            | 6[5, 7]                             | <b>&lt; 0.001</b> |
| Location of occlusion               |                                    |                                     | 0.053             |                                    |                                     | 0.246             |
| ICA or Tandem                       | 9(47.4)                            | 3 (25)                              |                   | 15(29.4)                           | 12 (33.3)                           |                   |
| M1                                  | 9(47.4)                            | 4 (33.3)                            |                   | 23(45.1)                           | 20 (55.6)                           |                   |
| M2                                  | 1(5.3)                             | 5(41.7)                             |                   | 13(25.5)                           | 4(11.1)                             |                   |
| mCTA score, n (%)                   |                                    |                                     | <b>0.04</b>       |                                    |                                     | <b>0.037</b>      |
| 1                                   | 0 (0)                              | 1(8.3)                              |                   | 0 (0)                              | 3(8.3)                              |                   |
| 2                                   | 0 (0)                              | 0(0)                                |                   | 2 (3.9)                            | 6(16.7)                             |                   |
| 3                                   | 7 (36.8)                           | 9 (75)                              |                   | 29 (56.9)                          | 19 (52.8)                           |                   |
| 4                                   | 9 (47.4)                           | 1(8.3)                              |                   | 18 (35.3)                          | 7(19.4)                             |                   |
| 5                                   | 3(15.8)                            | 1 (8.3)                             |                   | 2(3.9)                             | 1 (2.8)                             |                   |
| Good collaterals(4-5)               | 12(63.2)                           | 2(16.7)                             |                   | 20(39.2)                           | 8(22.2)                             |                   |
| Poor collaterals(1-3)               | 7(36.8)                            | 10(83.3)                            |                   | 31(60.8)                           | 28(77.8)                            |                   |
| mCTA score                          | 4[3, 4]                            | 3[3, 3]                             | <b>0.043</b>      | 4[3, 4]                            | 3[3, 3]                             | <b>0.04</b>       |
| rCBF<30%)(mL)                       | 1.6[0.6, 3.8]                      | 11.2[6.0, 28.3]                     | <b>&lt; 0.001</b> | 2.5[1.2, 6.5]                      | 12.9[5.2, 30.4]                     | <b>&lt; 0.001</b> |
| Mismatch ratio                      | 17[13.1,26.9]                      | 7.6[3, 15.9]                        | <b>0.024</b>      | 27.6[10.8,58.9]                    | 7.0[4.4, 19.1]                      | <b>&lt; 0.001</b> |
| TMax>6s (mL)                        | 29.2[19.5, 72.3]                   | 70.8[66.1, 95.8]                    | <b>0.012</b>      | 79.4[55.8, 114]                    | 117.9[84, 184.7]                    | <b>0.001</b>      |
| TMax>10s (mL)                       | 3.8[2, 8.8]                        | 30.8[26.4, 37.1]                    | <b>&lt; 0.001</b> | 8.9[5.5, 21.2]                     | 40[31.3, 78.2]                      | <b>&lt; 0.001</b> |
| HIR                                 | 0.2[0.1, 0.2]                      | 0.4[0.4, 0.5]                       | <b>&lt; 0.001</b> | 0.1[0.1, 0.2]                      | 0.4[0.3, 0.4]                       | <b>&lt; 0.001</b> |
| FIV                                 | 8.4[5.8, 16.1]                     | 74.7[56.2, 142.9]                   | <b>&lt; 0.001</b> | 12.8[8, 22.4]                      | 99.2[36.6, 169.2]                   | <b>&lt; 0.001</b> |
| 90d_mRS                             | 1[0, 1]                            | 4[3, 4]                             | <b>&lt; 0.001</b> | 1[0, 2]                            | 4[3, 5]                             | <b>&lt; 0.001</b> |

Values in parentheses represent percentage of patients (%); brackets represent first and third quartiles, respectively.

**Abbreviations:** NIHSS, National Institutes of Health Stroke Scale; ASPECTS, Alberta Stroke Program Early Computed Tomography Score; mCTA, multiphase CTA; rCBF, relative cerebral blood flow; TMax, the time when the residue function reaches its maximum; HIR, hypoperfusion intensity ratio.

**Supplementary Table S3. Baseline Patient Characteristics in supportive medical treatment group and Comparison of Clinical Variables Stratified by Functional Outcome**

| No. of patients and characteristics              | ALL<br>n= 117(100%) | Favorable outcome<br>n = 57(48.7%) | Unfavorable outcome<br>n =60(51.3%) | P-value           |
|--------------------------------------------------|---------------------|------------------------------------|-------------------------------------|-------------------|
| Age, Median (IQR)                                | 65 [56, 72]         | 65 [55, 70]                        | 65.5 [56.8, 74.2]                   | 0.606             |
| Male, n (%)                                      | 84 (71.8)           | 45 (78.9)                          | 39 (65)                             | 0.142             |
| Risk factors n (%)                               |                     |                                    |                                     |                   |
| Hypertension, n (%)                              | 99 (84.6)           | 46 (80.7)                          | 53 (88.3)                           | 0.375             |
| Diabetes, n (%)                                  | 34 (29.1)           | 16 (28.1)                          | 18 (30)                             | 0.979             |
| Hyperlipidemia, n (%)                            | 55 (47)             | 27 (47.4)                          | 28 (46.7)                           | 1                 |
| Prior stroke, n (%)                              | 30 (25.6)           | 13 (22.8)                          | 17 (28.3)                           | 0.637             |
| Coronary artery disease, n (%)                   | 21 (17.9)           | 14 (24.6)                          | 7 (11.7)                            | 0.115             |
| Valvular disease, n (%)                          | 20(17.1)            | 7 (12.3)                           | 13 (21.7)                           | 0.27              |
| Chronic heart failure, n (%)                     | 13 (11.1)           | 4 (7)                              | 9 (15)                              | 0.281             |
| Atrial fibrillation, n (%)                       | 21 (17.9)           | 7 (12.3)                           | 14 (23.3)                           | <b>0.188</b>      |
| Smoke, n (%)                                     | 40 (34.2)           | 23 (40.4)                          | 17 (28.3)                           | 0.24              |
| Drink, n (%)                                     | 14 (12)             | 6 (10.5)                           | 8 (13.3)                            | 0.855             |
| Homocysteine, Median [IQR]                       | 13.3 [10.8, 16.3]   | 13.3[10.8, 16.2]                   | 13.3 [10.9, 16.6]                   | 0.952             |
| SBP, Median [IQR]                                | 150 [133, 167]      | 142[130, 169]                      | 152[137.5, 164]                     | 0.39              |
| DBP, Median [IQR]                                | 89 [80, 96]         | 88 [80, 95]                        | 89 [80,99]                          | 0.466             |
| HR, Median [IQR]                                 | 78 [74, 90]         | 78 [72, 86]                        | 80 [74, 97]                         | <b>0.09</b>       |
| Blood Glucose, Median [IQR]                      | 6 [5.2, 8.1]        | 5.6 [5.1, 7.1]                     | 6.6 [5.7, 8.5]                      | <b>0.037</b>      |
| Glycosylated hemoglobin, Median[IQR]             | 5.9[5.6, 6.4]       | 5.9 [5.7, 6.5]                     | 5.8 [5.4, 6.4]                      | 0.051             |
| Time to CT(min) ,Median[IQR]                     | 690[450, 1020]      | 630[420, 900]                      | 750[474, 1080]                      | 0.114             |
| Baseline NIHSS, Median[IQR]                      | 10[4, 15]           | 5[3, 10]                           | 14 [8, 19]                          | <b>&lt; 0.001</b> |
| Imaging items                                    |                     |                                    |                                     |                   |
| ASPECTS on NCCT, Median[IQR]                     | 7[6, 7]             | 7[7, 8]                            | 6[4, 7]                             | <b>&lt; 0.001</b> |
| Location of occlusion on mCTA, n (%)             |                     |                                    |                                     | 0.414             |
| ICA or Tandem                                    | 44 (37.6)           | 21 (36.8)                          | 23 (38.3)                           |                   |
| M1                                               | 48 (41)             | 21 (36.8)                          | 27 (45)                             |                   |
| M2 or further distal                             | 25(21.4)            | 15 (26.3)                          | 10 (16.7)                           |                   |
| mCTA score, n (%)                                |                     |                                    |                                     | <b>&lt; 0.001</b> |
| 1                                                | 16 (13.7)           | 0 (0)                              | 16 (26.7)                           |                   |
| 2                                                | 9 (7.7)             | 0 (0)                              | 9 (15)                              |                   |
| 3                                                | 53 (45.3)           | 27 (47.4)                          | 26 (43.3)                           |                   |
| 4                                                | 28 (23.9)           | 19 (33.3)                          | 9 (15)                              |                   |
| 5                                                | 11 (9.4)            | 11 (19.3)                          | 0 (0)                               |                   |
| Good collaterals (4-5)                           | 39( 33.3)           | 30(52.6)                           | 9(15)                               |                   |
| Poor collaterals (1-3)                           | 78( 66.7)           | 27(47.4)                           | 51(85)                              |                   |
| mCTA score , Median [IQR]                        | 3[3, 4]             | 3[3, 4]                            | 3[2, 3]                             | <b>&lt; 0.001</b> |
| ischemic core volume(rCBF<30%)(mL), Median [IQR] | 4.8[1.7, 26.9]      | 1.8[0.9, 3.4]                      | 16.9[6.4, 54.7]                     | <b>&lt; 0.001</b> |
| Mismatch ratio, Median [IQR]                     | 10.8[3.3, 28.1]     | 22.9[12.2, 39.8]                   | 3.8[1.7, 11.3]                      | <b>&lt; 0.001</b> |
| TMax>6s volume(mL), Median [IQR]                 | 66.8[38.7, 117.9]   | 42.8[27.4, 66.8]                   | 95.7[66.3, 138.9]                   | <b>&lt; 0.001</b> |
| TMax>10s volume(mL), Median [IQR]                | 17.5[5.3, 41.7]     | 5.3[2.8, 12.2]                     | 41.2[23.6, 63.4]                    | <b>&lt; 0.001</b> |
| HIR, Median [IQR]                                | 0.3[0.1, 0.4]       | 0.2[0.1, 0.2]                      | 0.4[0.4, 0.5]                       | <b>&lt; 0.001</b> |
| FIV, Median [IQR]                                | 29.3[12.6, 78.4]    | 13.8[7.9, 20]                      | 77.3[45.2, 156.3]                   | <b>&lt; 0.001</b> |
| 90d_mRS, Median [IQR]                            | 3[2, 4]             | 2[1, 2]                            | 4[3, 4]                             | <b>&lt; 0.001</b> |

Values in parentheses represent percentage of patients (%); brackets represent first and third quartiles, respectively.

**Abbreviations:** SBP, systolic pressure; DBP, diastolic blood pressure; HR, heart rate; NIHSS, National Institutes of Health Stroke

Scale; ASPECTS, Alberta Stroke Program Early Computed Tomography Score; NCCT, unenhanced CT; mCTA, multiphase

CTA;ICA, internal cerebral artery; rCBF, relative cerebral blood flow; TMax, the time when the residue function reaches its maximum;

HIR, hypoperfusion intensity ratio; FIV, follow-up infarct volume; EVT, endovascular thrombectomy; mRS, modified Rankin scale.

**Supplementary Table S4. Multivariable logistic regression analysis for functional outcome in different type of treatment arm**

| Variables      | reperfusion treatment group<br>(n=118)<br>aOR (95% CI) | <i>p</i> -value | Supportive medical treatment<br>group(n=117)<br>aOR (95% CI) | <i>p</i> -value |
|----------------|--------------------------------------------------------|-----------------|--------------------------------------------------------------|-----------------|
| Age            | 1 (0.91-1.09)                                          | 0.924           | 1 (0.92-1.09)                                                | 0.935           |
| Gender         | 0.9 (0.05-15.78)                                       | 0.944           | 0.34 (0.03-3.91)                                             | 0.386           |
| Blood Glucose  | 1.48 (0.99-2.23)                                       | 0.058           | 1.12 (0.78-1.6)                                              | 0.547           |
| NIHSS          | 1.18 (0.98-1.43)                                       | 0.086           | 1.05 (0.86-1.28)                                             | 0.616           |
| ASPECTS        | 0.58 (0.18-1.9)                                        | 0.37            | 0.27 (0.06-1.1)                                              | 0.068           |
| mCTA score     | 0.2 (0.03-1.48)                                        | 0.117           | 0.48 (0.11-2.22)                                             | 0.349           |
| rCBF<30%       | 0.93 (0.87-1)                                          | 0.054           | 1 (0.91-1.09)                                                | 0.914           |
| TMax > 6s      | 1 (0.99-1.02)                                          | 0.903           | 1 (0.98-1.02)                                                | 0.949           |
| HIR (per 0.01) | 1.55 (1.21-1.98)                                       | <0.001          | 1.31 (1.14-1.5)                                              | <0.001          |

we adjusted age, Gender , blood glucose, NIHSS,ASPECTS, mCTA score, rCBF<30% , TMax > 6s

**Abbreviations:** NIHSS, National Institutes of Health Stroke Scale; ASPECTS, Alberta Stroke Program Early Computed Tomography Score; mCTA, multiphase CTA; rCBF, relative cerebral blood flow; TMax, the time when the residue function reaches its maximum; HIR, hypoperfusion intensity ratio.

**Supplementary Table S5. Multivariable logistic regression analysis for functional outcome in EVT group**

| Variables             | EVT group(n=87)  |                  |                  |                  |
|-----------------------|------------------|------------------|------------------|------------------|
|                       | Crude OR, 95%CI  | <i>p</i> -value  | aOR, 95%CI       | <i>p</i> -value  |
| <b>Age</b>            | 1.01 (0.98-1.05) | 0.44             |                  |                  |
| <b>Gender</b>         | 1.13 (0.38-3.37) | 0.831            |                  |                  |
| <b>Blood Glucose</b>  | 1.12 (0.96-1.3)  | 0.137            |                  |                  |
| <b>NIHSS</b>          | 1.11 (1.03-1.19) | <b>0.004</b>     | 1.14 (0.96-1.34) | 0.13             |
| <b>ASPECTS</b>        | 0.47 (0.3-0.71)  | <b>&lt;0.001</b> | 0.65 (0.21-2.04) | 0.457            |
| <b>mCTA score</b>     | 0.42 (0.22-0.81) | <b>0.009</b>     | 0.21 (0.03-1.51) | 0.12             |
| <b>rCBF&lt;30%</b>    | 1.05(1.01-1.08)  | <b>0.006</b>     | 0.97 (0.92-1.01) | 0.166            |
| <b>TMax &gt; 6s</b>   | 1.01 (1 -1.02)   | <b>0.006</b>     | 0.94 (0.87-1.01) | 0.083            |
| <b>HIR (per 0.01)</b> | 1.32 (1.17-1.48) | <b>&lt;0.001</b> | 1.49 (1.18-1.88) | <b>&lt;0.001</b> |

**Crude model: no other covariates were adjusted.**

**Adjusted model: we adjusted NIHSS, ASPECTS, mCTA score, rCBF<30% , Tmax > 6s**

**Supplementary Table S6. Correlation between HIR , mCTA with Functional Outcome in different subgroup**

| Variable    | Functional Outcome(90-d mRS) |                  |                    |                  |                    |                  |                    |                  |                    |                  |
|-------------|------------------------------|------------------|--------------------|------------------|--------------------|------------------|--------------------|------------------|--------------------|------------------|
|             | Total<br>(n=235)             | <i>p</i> -value  | group 1<br>(n=118) | <i>p</i> -value  | group 2<br>(n=117) | <i>p</i> -value  | group 3<br>(n=117) | <i>p</i> -value  | group 4<br>(n=117) | <i>p</i> -value  |
| <b>HIR</b>  | 0.8519                       | <i>P</i> <0.0001 | 0.8413             | <i>P</i> <0.0001 | 0.8801             | <i>P</i> <0.0001 | 0.8714             | <i>P</i> <0.0001 | 0.8477             | <i>P</i> <0.0001 |
| <b>mCTA</b> | - 0.4657                     | <i>P</i> <0.0001 | - 0.3269           | <i>P</i> =0.0003 | - 0.6049           | <i>P</i> <0.0001 | - 0.4561           | <i>P</i> =0.0003 | - 0.466            | <i>P</i> <0.0001 |

group 1 reperfusion treatment; group 2 Supportive medical treatment; group 3 early time window(<6h); group 4 late time window(6-24h)
